# Supplementary material for: Monitoring of Tidal Variation and Temperature Change-Induced Movements of an Immersed Tunnel Using Distributed Optical Fiber Sensors (DOFSs)
Source: Hindawi journal article supplement (doi:10.1155/2023/2419495), 2023-07-12
Supplement: f1 [file 2419495.f1.pdf]

| 39     | 40     | 41     | 42     | 43     | 44     | 45     | 46     | 47     | 48     | 1      | 2      | 3      | 4      | 5      | 6      | 7      | 8      | 9      | 10     | 11     | 12     | 13     | 14     | 15     | 16     | 17     | 18     | 19     | 20     | 21     | 22     | 23     | 24     | 25     | 26     | 27     | 28     | 29     |
|--------|--------|--------|--------|--------|--------|--------|--------|--------|--------|--------|--------|--------|--------|--------|--------|--------|--------|--------|--------|--------|--------|--------|--------|--------|--------|--------|--------|--------|--------|--------|--------|--------|--------|--------|--------|--------|--------|--------|
| June12 | June13 |
| -0.01  | 0.01   | 0.00   | 0.01   | 0.02   | 0.05   | 0.05   | 0.05   | 0.07   | 0.07   | 0.08   | 0.09   | 0.10   | 0.10   | 0.11   | 0.11   | 0.10   | 0.11   | 0.12   | 0.14   | 0.15   | 0.17   | 0.17   | 0.17   | 0.20   | 0.16   | 0.17   | 0.16   | 0.15   | 0.14   | 0.13   | 0.13   | 0.10   | 0.10   | 0.10   | 0.08   | 0.07   | 0.05   | 0.04   |
| 0.00   | 0.07   | 0.07   | 0.06   | 0.04   | 0.07   | 0.08   | 0.06   | 0.09   | 0.10   | 0.11   | 0.10   | 0.13   | 0.12   | 0.13   | 0.15   | 0.14   | 0.17   | 0.17   | 0.18   | 0.19   | 0.20   | 0.21   | 0.21   | 0.21   | 0.21   | 0.21   | 0.22   | 0.20   | 0.20   | 0.20   | 0.20   | 0.19   | 0.19   | 0.17   | 0.17   | 0.17   | 0.17   |        |
| 0.02   | 0.02   | 0.03   | 0.03   | 0.03   | 0.06   | 0.04   | 0.06   | 0.06   | 0.08   | 0.07   | 0.09   | 0.08   | 0.09   | 0.10   | 0.11   | 0.10   | 0.11   | 0.12   | 0.13   | 0.13   | 0.13   | 0.14   | 0.14   | 0.14   | 0.15   | 0.14   | 0.14   | 0.14   | 0.13   | 0.13   | 0.12   | 0.11   | 0.10   | 0.10   | 0.10   | 0.10   | 0.11   |        |
| 0.01   | 0.02   | 0.01   | 0.02   | 0.03   | 0.03   | 0.03   | 0.05   | 0.06   | 0.07   | 0.06   | 0.07   | 0.08   | 0.09   | 0.09   | 0.08   | 0.09   | 0.08   | 0.09   | 0.09   | 0.10   | 0.10   | 0.10   | 0.10   | 0.12   | 0.10   | 0.12   | 0.10   | 0.11   | 0.11   | 0.11   | 0.11   | 0.10   | 0.11   | 0.09   | 0.11   | 0.10   | 0.11   |        |
| 0.02   | 0.03   | 0.02   | 0.04   | 0.04   | 0.05   | 0.05   | 0.06   | 0.06   | 0.07   | 0.07   | 0.08   | 0.08   | 0.09   | 0.09   | 0.08   | 0.10   | 0.10   | 0.11   | 0.11   | 0.11   | 0.12   | 0.12   | 0.12   | 0.12   | 0.12   | 0.13   | 0.13   | 0.13   | 0.13   | 0.13   | 0.13   | 0.13   | 0.12   | 0.12   | 0.13   | 0.12   | 0.13   |        |
| 0.01   | 0.01   | 0.01   | 0.01   | 0.01   | 0.03   | 0.04   | 0.03   | 0.03   | 0.03   | 0.05   | 0.05   | 0.05   | 0.06   | 0.06   | 0.07   | 0.08   | 0.08   | 0.09   | 0.09   | 0.09   | 0.10   | 0.10   | 0.10   | 0.10   | 0.10   | 0.10   | 0.11   | 0.11   | 0.11   | 0.11   | 0.11   | 0.11   | 0.11   | 0.10   | 0.11   | 0.10   | 0.10   |        |
| -0.04  | -0.04  | -0.03  | -0.03  | -0.02  | 0.00   | 0.00   | 0.01   | 0.02   | 0.03   | 0.04   | 0.04   | 0.06   | 0.07   | 0.08   | 0.06   | 0.08   | 0.09   | 0.09   | 0.11   | 0.11   | 0.12   | 0.13   | 0.11   | 0.10   | 0.10   | 0.11   | 0.11   | 0.11   | 0.11   | 0.11   | 0.10   | 0.11   | 0.09   | 0.10   | 0.09   | 0.07   |        |        |
| 0.02   | 0.02   | 0.03   | 0.04   | 0.04   | 0.07   | 0.06   | 0.06   | 0.07   | 0.08   | 0.09   | 0.10   | 0.10   | 0.10   | 0.11   | 0.10   | 0.11   | 0.10   | 0.11   | 0.12   | 0.12   | 0.12   | 0.12   | 0.12   | 0.12   | 0.12   | 0.12   | 0.12   | 0.12   | 0.12   | 0.12   | 0.12   | 0.11   | 0.11   | 0.11   | 0.10   | 0.11   | 0.10   |        |
| 0.01   | 0.01   | 0.02   | 0.03   | 0.03   | 0.04   | 0.04   | 0.04   | 0.06   | 0.05   | 0.06   | 0.06   | 0.07   | 0.07   | 0.08   | 0.08   | 0.09   | 0.08   | 0.10   | 0.09   | 0.09   | 0.10   | 0.09   | 0.10   | 0.11   | 0.11   | 0.11   | 0.11   | 0.11   | 0.12   | 0.12   | 0.10   | 0.11   | 0.11   | 0.10   | 0.10   | 0.10   | 0.10   |        |
| 0.03   | 0.03   | 0.04   | 0.05   | 0.04   | 0.05   | 0.06   | 0.07   | 0.07   | 0.08   | 0.08   | 0.09   | 0.09   | 0.08   | 0.09   | 0.10   | 0.09   | 0.10   | 0.09   | 0.10   | 0.11   | 0.11   | 0.11   | 0.11   | 0.11   | 0.11   | 0.11   | 0.11   | 0.11   | 0.12   | 0.12   | 0.11   | 0.11   | 0.11   | 0.11   | 0.12   | 0.10   | 0.09   |        |
| -0.02  | 0.00   | -0.01  | -0.01  | 0.00   | -0.01  | 0.01   | 0.01   | 0.02   | 0.02   | 0.04   | 0.04   | 0.05   | 0.05   | 0.05   | 0.07   | 0.07   | 0.07   | 0.09   | 0.09   | 0.10   | 0.11   | 0.10   | 0.11   | 0.10   | 0.11   | 0.10   | 0.11   | 0.13   | 0.13   | 0.13   | 0.13   | 0.12   | 0.12   | 0.11   | 0.12   | 0.11   | 0.10   |        |
| 0.02   | 0.02   | 0.02   | 0.03   | 0.04   | 0.03   | 0.05   | 0.05   | 0.05   | 0.05   | 0.06   | 0.06   | 0.06   | 0.07   | 0.07   | 0.08   | 0.09   | 0.08   | 0.09   | 0.08   | 0.08   | 0.09   | 0.10   | 0.10   | 0.09   | 0.10   | 0.08   | 0.08   | 0.10   | 0.09   | 0.09   | 0.10   | 0.08   | 0.08   | 0.08   | 0.08   | 0.08   | 0.07   |        |
| 0.02   | 0.02   | 0.03   | 0.03   | 0.03   | 0.03   | 0.05   | 0.05   | 0.04   | 0.06   | 0.05   | 0.05   | 0.06   | 0.06   | 0.07   | 0.07   | 0.08   | 0.09   | 0.09   | 0.10   | 0.11   | 0.10   | 0.10   | 0.10   | 0.10   | 0.10   | 0.10   | 0.10   | 0.09   | 0.10   | 0.10   | 0.10   | 0.08   | 0.08   | 0.08   | 0.08   | 0.07   | 0.07   |        |
| 0.01   | 0.02   | 0.01   | 0.02   | 0.02   | 0.02   | 0.03   | 0.03   | 0.04   | 0.04   | 0.05   | 0.05   | 0.06   | 0.05   | 0.06   | 0.05   | 0.06   | 0.05   | 0.06   | 0.07   | 0.07   | 0.07   | 0.07   | 0.07   | 0.08   | 0.08   | 0.08   | 0.09   | 0.08   | 0.09   | 0.09   | 0.10   | 0.08   | 0.08   | 0.09   | 0.08   | 0.08   | 0.07   |        |
| 0.01   | 0.02   | 0.03   | 0.02   | 0.04   | 0.04   | 0.04   | 0.04   | 0.05   | 0.05   | 0.03   | 0.07   | 0.06   | 0.07   | 0.07   | 0.07   | 0.07   | 0.07   | 0.07   | 0.08   | 0.08   | 0.08   | 0.08   | 0.08   | 0.09   | 0.09   | 0.09   | 0.08   | 0.08   | 0.09   | 0.10   | 0.08   | 0.08   | 0.08   | 0.08   | 0.08   | 0.08   | 0.08   |        |
| 0.03   | 0.04   | 0.05   | 0.04   | 0.05   | 0.06   | 0.07   | 0.06   | 0.07   | 0.08   | 0.08   | 0.09   | 0.09   | 0.09   | 0.09   | 0.11   | 0.11   | 0.11   | 0.11   | 0.12   | 0.12   | 0.13   | 0.13   | 0.14   | 0.13   | 0.14   | 0.13   | 0.14   | 0.14   | 0.12   | 0.13   | 0.13   | 0.14   | 0.15   | 0.12   | 0.13   | 0.14   | 0.15   | 0.12   |
| 0.02   | 0.01   | 0.02   | 0.03   | 0.02   | 0.02   | 0.05   | 0.04   | 0.05   | 0.05   | 0.06   | 0.06   | 0.09   | 0.07   | 0.09   | 0.10   | 0.10   | 0.11   | 0.10   | 0.11   | 0.13   | 0.15   | 0.13   | 0.15   | 0.14   | 0.15   | 0.14   | 0.15   | 0.14   | 0.15   | 0.16   | 0.14   | 0.14   | 0.13   | 0.14   | 0.13   | 0.14   | 0.13   |        |
| 0.02   | 0.01   | 0.02   | 0.02   | 0.02   | 0.03   | 0.03   | 0.04   | 0.04   | 0.04   | 0.05   | 0.05   | 0.06   | 0.06   | 0.06   | 0.06   | 0.06   | 0.06   | 0.06   | 0.06   | 0.06   | 0.06   | 0.06   | 0.06   | 0.06   | 0.06   | 0.06   | 0.06   | 0.06   | 0.06   | 0.06   | 0.06   | 0.06   | 0.06   | 0.06   | 0.06   | 0.06   | 0.05   |        |
| 0.04   | 0.04   | 0.04   | 0.04   | 0.04   | 0.04   | 0.04   | 0.04   | 0.04   | 0.04   | 0.04   | 0.04   | 0.04   | 0.04   | 0.04   | 0.04   | 0.04   | 0.04   | 0.04   | 0.04   | 0.04   | 0.04   | 0.04   | 0.04   | 0.04   | 0.04   | 0.04   | 0.04   | 0.04   | 0.04   | 0.04   | 0.04   | 0.04   | 0.04   | 0.04   | 0.04   | 0.04   | 0.04   |        |
| 0.03   | 0.03   | 0.02   | 0.03   | 0.03   | 0.04   | 0.04   | 0.05   | 0.05   | 0.04   | 0.05   | 0.06   | 0.05   | 0.06   | 0.05   | 0.05   | 0.07   | 0.07   | 0.07   | 0.08   | 0.08   | 0.08   | 0.08   | 0.08   | 0.09   | 0.09   | 0.09   | 0.09   | 0.08   | 0.10   | 0.09   | 0.08   | 0.09   | 0.08   | 0.09   | 0.08   | 0.10   | 0.08   |        |
| 0.04   | 0.03   | 0.03   | 0.03   | 0.04   | 0.05   | 0.04   | 0.05   | 0.05   | 0.06   | 0.06   | 0.07   | 0.08   | 0.09   | 0.09   | 0.10   | 0.10   | 0.12   | 0.11   | 0.10   | 0.12   | 0.11   | 0.13   | 0.11   | 0.12   | 0.11   | 0.13   | 0.11   | 0.12   | 0.13   | 0.12   | 0.11   | 0.12   | 0.11   | 0.11   | 0.11   | 0.11   | 0.11   |        |
| 0.02   | 0.03   | 0.02   | 0.03   | 0.03   | 0.04   | 0.04   | 0.04   | 0.05   | 0.05   | 0.06   | 0.06   | 0.06   | 0.06   | 0.07   | 0.07   | 0.07   | 0.08   | 0.08   | 0.08   | 0.08   | 0.09   | 0.09   | 0.09   | 0.09   | 0.09   | 0.09   | 0.09   | 0.09   | 0.09   | 0.09   | 0.09   | 0.09   | 0.09   | 0.09   | 0.09   | 0.09   | 0.09   |        |
| 0.05   | 0.05   | 0.05   | 0.06   | 0.06   | 0.06   | 0.06   | 0.08   | 0.07   | 0.08   | 0.10   | 0.10   | 0.11   | 0.14   | 0.11   | 0.12   | 0.12   | 0.13   | 0.12   | 0.14   | 0.13   | 0.15   | 0.15   | 0.16   | 0.14   | 0.15   | 0.18   | 0.15   | 0.17   | 0.16   | 0.17   | 0.19   | 0.18   | 0.19   | 0.18   | 0.20   | 0.18   | 0.18   |        |
| 0.03   | 0.03   | 0.04   | 0.04   | 0.05   | 0.05   | 0.05   | 0.06   | 0.06   | 0.08   | 0.07   | 0.09   | 0.09   | 0.10   | 0.10   | 0.11   | 0.10   | 0.11   | 0.10   | 0.12   | 0.12   | 0.13   | 0.12   | 0.13   | 0.12   | 0.13   | 0.12   | 0.13   | 0.12   | 0.13   | 0.11   | 0.13   | 0.13   | 0.13   | 0.13   | 0.13   | 0.12   | 0.12   |        |
| 0.04   | 0.04   | 0.04   | 0.04   | 0.05   | 0.05   | 0.05   | 0.06   | 0.06   | 0.08   | 0.07   | 0.09   | 0.09   | 0.10   | 0.10   | 0.11   | 0.10   | 0.11   | 0.10   | 0.12   | 0.12   | 0.13   | 0.12   | 0.13   | 0.12   | 0.13   | 0.12   | 0.13   | 0.12   | 0.13   | 0.11   | 0.13   | 0.13   | 0.13   | 0.13   | 0.13   | 0.12   | 0.12   |        |
| 0.05   | 0.05   | 0.06   | 0.07   | 0.07   | 0.07   | 0.07   | 0.09   | 0.10   | 0.09   | 0.09   | 0.11   | 0.11   | 0.12   | 0.13   | 0.12   | 0.13   | 0.14   | 0.14   | 0.16   | 0.16   | 0.17   | 0.16   | 0.17   | 0.16   | 0.17   | 0.16   | 0.17   | 0.16   | 0.16   | 0.16   | 0.16   | 0.14   | 0.14   | 0.14   | 0.12   | 0.12   |        |        |
| 0.07   | 0.06   | 0.07   | 0.07   | 0.07   | 0.08   | 0.08   | 0.09   | 0.08   | 0.09   | 0.09   | 0.10   | 0.10   | 0.11   | 0.11   | 0.12   | 0.12   | 0.13   | 0.14   | 0.14   | 0.15   | 0.17   | 0.17   | 0.17   | 0.17   | 0.17   | 0.17   | 0.17   | 0.17   | 0.17   | 0.17   | 0.17   | 0.17   | 0.15   | 0.15   | 0.15   | 0.14   |        |        |
| 0.03   | 0.04   | 0.04   | 0.04   | 0.04   | 0.05   | 0.06   | 0.06   | 0.07   | 0.08   | 0.09   | 0.10   | 0.10   | 0.11   | 0.12   | 0.12   | 0.13   | 0.14   | 0.14   | 0.16   | 0.16   | 0.17   | 0.16   | 0.17   | 0.16   | 0.17   | 0.16   | 0.17   | 0.16   | 0.16   | 0.16   | 0.16   | 0.15   | 0.16   | 0.14   | 0.12   | 0.13   | 0.12   |        |

| June12 | June13 |
|--------|--------|--------|--------|--------|--------|--------|--------|--------|--------|--------|--------|--------|--------|--------|--------|--------|--------|--------|--------|--------|--------|--------|--------|--------|--------|--------|--------|--------|--------|--------|--------|--------|--------|--------|--------|--------|--------|--------|
| -0.35  | -0.32  | -0.30  | -0.27  | -0.28  | -0.20  | -0.16  | -0.13  | -0.12  | -0.11  | -0.11  | -0.12  | -0.14  | -0.12  | -0.12  | -0.09  | -0.13  | -0.18  | -0.22  | -0.30  | -0.34  | -0.37  | -0.42  | -0.36  | -0.36  | -0.34  | -0.31  | -0.29  | -0.26  | -0.23  | -0.18  | -0.19  | -0.15  | -0.16  | -0.16  | -0.16  | -0.15  |        |        |
| -0.08  | -0.04  | -0.05  | -0.03  | -0.02  | -0.02  | -0.02  | -0.05  | -0.01  | 0.00   | 0.01   | 0.00   | 0.01   | 0.00   | -0.02  | -0.01  | 0.02   | -0.03  | 0.00   | -0.01  | 0.00   | -0.01  | -0.01  | -0.01  | -0.02  | 0.03   | -0.02  | 0.00   | -0.05  | -0.03  | -0.02  | -0.04  | -0.04  | -0.05  | -0.07  | -0.05  | -0.03  |        |        |
| -0.03  | -0.01  | 0.01   | 0.00   | 0.00   | 0.01   | 0.01   | 0.02   | -0.01  | 0.03   | 0.01   | -0.02  | 0.01   | 0.01   | 0.02   | 0.00   | 0.03   | 0.01   | 0.03   | 0.01   | 0.03   | 0.02   | 0.03   | 0.06   | 0.01   | 0.03   | 0.02   | 0.02   | 0.01   | 0.03   | 0.00   | 0.00   | 0.01   | 0.00   | -0.01  | 0.00   | -0.01  | 0.00   |        |
| 0.01   | 0.02   | 0.01   | 0.01   | 0.00   | 0.03   | 0.05   | 0.03   | 0.02   | 0.04   | 0.05   | 0.04   | 0.04   | 0.05   | 0.04   | 0.05   | 0.04   | 0.02   | 0.04   | 0.04   | 0.04   | 0.04   | 0.04   | 0.03   | 0.05   | 0.04   | 0.03   | 0.04   | 0.03   | 0.04   | 0.05   | 0.03   | 0.03   | 0.03   | 0.03   | 0.02   | 0.04   | 0.03   |        |
| 0.00   | -0.01  | 0.02   | 0.00   | 0.01   | 0.01   | 0.03   | 0.02   | 0.03   | 0.01   | 0.01   | 0.04   | 0.02   | 0.02   | 0.05   | 0.02   | 0.04   | 0.03   | 0.05   | 0.02   | 0.03   | 0.03   | 0.04   | 0.03   | 0.04   | 0.03   | 0.04   | 0.02   | 0.03   | 0.04   | 0.02   | 0.03   | 0.03   |        |        |        |        |        |        |

| 30     | 31     | 32     | 33     | 34     | 35     | 36     | 37     | 38     | 39     | 40     | 41     | 42     | 43     | 44     | 45     | 46     | 47     | 48     | 1      | 2      | 3      | 4      | 5      | 6      | 7      | 8      | 9      | 10     | 11     | 12     | 13     | 14     | 15     | 16     | 17     | 18     | 19     | 20     |        |
|--------|--------|--------|--------|--------|--------|--------|--------|--------|--------|--------|--------|--------|--------|--------|--------|--------|--------|--------|--------|--------|--------|--------|--------|--------|--------|--------|--------|--------|--------|--------|--------|--------|--------|--------|--------|--------|--------|--------|--------|
| June13 | June14 |
| 0.04   | 0.03   | 0.02   | 0.01   | 0.02   | 0.00   | 0.00   | 0.00   | -0.01  | -0.01  | -0.01  | -0.01  | 0.00   | -0.01  | -0.01  | 0.00   | 0.01   | 0.00   | 0.00   | 0.00   | 0.01   | 0.03   | 0.04   | 0.04   | 0.05   | 0.06   | 0.05   | 0.05   | 0.05   | 0.06   | 0.08   | 0.08   | 0.07   | 0.08   | 0.08   | 0.06   | 0.06   | 0.07   | 0.03   | 0.01   |
| 0.15   | 0.15   | 0.14   | 0.14   | 0.11   | 0.11   | 0.10   | 0.10   | 0.10   | 0.10   | 0.10   | 0.10   | 0.08   | 0.08   | 0.08   | 0.08   | 0.08   | 0.07   | 0.07   | 0.07   | 0.07   | 0.07   | 0.09   | 0.08   | 0.10   | 0.10   | 0.10   | 0.11   | 0.10   | 0.12   | 0.14   | 0.14   | 0.14   | 0.15   | 0.15   | 0.15   | 0.15   | 0.14   | 0.14   |        |
| 0.08   | 0.08   | 0.08   | 0.08   | 0.06   | 0.07   | 0.04   | 0.05   | 0.05   | 0.05   | 0.05   | 0.05   | 0.03   | 0.04   | 0.04   | 0.04   | 0.03   | 0.03   | 0.06   | 0.05   | 0.06   | 0.06   | 0.06   | 0.06   | 0.06   | 0.08   | 0.08   | 0.07   | 0.08   | 0.09   | 0.08   | 0.09   | 0.11   | 0.11   | 0.09   | 0.09   | 0.08   | 0.08   |        |        |
| 0.09   | 0.09   | 0.08   | 0.07   | 0.06   | 0.07   | 0.06   | 0.05   | 0.04   | 0.04   | 0.05   | 0.04   | 0.04   | 0.03   | 0.04   | 0.03   | 0.04   | 0.03   | 0.04   | 0.05   | 0.04   | 0.04   | 0.05   | 0.06   | 0.06   | 0.06   | 0.06   | 0.07   | 0.06   | 0.07   | 0.07   | 0.07   | 0.08   | 0.08   | 0.09   | 0.09   | 0.07   | 0.07   |        |        |
| 0.09   | 0.11   | 0.09   | 0.09   | 0.08   | 0.08   | 0.08   | 0.07   | 0.07   | 0.07   | 0.06   | 0.05   | 0.06   | 0.05   | 0.06   | 0.05   | 0.06   | 0.05   | 0.07   | 0.06   | 0.06   | 0.06   | 0.07   | 0.07   | 0.07   | 0.08   | 0.08   | 0.08   | 0.09   | 0.09   | 0.09   | 0.09   | 0.09   | 0.09   | 0.09   | 0.09   | 0.09   | 0.08   |        |        |
| 0.10   | 0.09   | 0.07   | 0.08   | 0.06   | 0.06   | 0.07   | 0.05   | 0.05   | 0.05   | 0.04   | 0.04   | 0.03   | 0.03   | 0.03   | 0.03   | 0.02   | 0.05   | 0.02   | 0.02   | 0.04   | 0.03   | 0.03   | 0.03   | 0.03   | 0.04   | 0.04   | 0.04   | 0.07   | 0.05   | 0.06   | 0.06   | 0.06   | 0.05   | 0.06   | 0.05   | 0.06   | 0.05   | 0.06   |        |
| 0.07   | 0.06   | 0.04   | 0.03   | 0.03   | 0.03   | 0.02   | 0.02   | -0.01  | 0.00   | -0.01  | -0.02  | -0.01  | -0.02  | -0.01  | -0.02  | -0.01  | -0.01  | -0.01  | 0.00   | 0.03   | 0.03   | 0.02   | 0.04   | 0.03   | 0.03   | 0.03   | 0.03   | 0.05   | 0.05   | 0.07   | 0.07   | 0.07   | 0.06   | 0.07   | 0.04   | 0.05   | 0.03   | 0.01   |        |
| 0.09   | 0.08   | 0.08   | 0.08   | 0.07   | 0.11   | 0.11   | 0.10   | 0.10   | 0.10   | 0.10   | 0.10   | 0.08   | 0.08   | 0.08   | 0.08   | 0.08   | 0.08   | 0.08   | 0.08   | 0.08   | 0.08   | 0.08   | 0.08   | 0.08   | 0.08   | 0.08   | 0.08   | 0.08   | 0.08   | 0.08   | 0.08   | 0.08   | 0.08   | 0.08   | 0.08   | 0.08   | 0.08   | 0.07   | 0.08   |
| 0.09   | 0.09   | 0.07   | 0.07   | 0.07   | 0.07   | 0.06   | 0.07   | 0.06   | 0.05   | 0.04   | 0.04   | 0.05   | 0.05   | 0.05   | 0.05   | 0.05   | 0.05   | 0.05   | 0.05   | 0.05   | 0.05   | 0.06   | 0.06   | 0.06   | 0.06   | 0.06   | 0.07   | 0.07   | 0.07   | 0.07   | 0.08   | 0.08   | 0.09   | 0.08   | 0.08   | 0.07   | 0.08   | 0.08   |        |
| 0.08   | 0.07   | 0.09   | 0.06   | 0.07   | 0.07   | 0.07   | 0.07   | 0.07   | 0.06   | 0.05   | 0.04   | 0.04   | 0.04   | 0.04   | 0.03   | 0.04   | 0.02   | 0.03   | 0.03   | 0.04   | 0.03   | 0.04   | 0.04   | 0.05   | 0.06   | 0.06   | 0.07   | 0.07   | 0.07   | 0.07   | 0.07   | 0.07   | 0.06   | 0.08   | 0.08   | 0.08   | 0.07   | 0.08   |        |
| 0.09   | 0.08   | 0.08   | 0.08   | 0.07   | 0.08   | 0.07   | 0.07   | 0.06   | 0.05   | 0.05   | 0.06   | 0.04   | 0.05   | 0.05   | 0.05   | 0.05   | 0.06   | 0.04   | 0.06   | 0.07   | 0.06   | 0.07   | 0.07   | 0.08   | 0.08   | 0.08   | 0.09   | 0.09   | 0.09   | 0.09   | 0.09   | 0.09   | 0.09   | 0.09   | 0.09   | 0.09   | 0.08   | 0.07   |        |
| 0.09   | 0.09   | 0.09   | 0.07   | 0.07   | 0.06   | 0.05   | 0.03   | 0.05   | 0.05   | 0.04   | 0.04   | 0.04   | 0.03   | 0.03   | 0.04   | 0.03   | 0.03   | 0.04   | 0.05   | 0.05   | 0.06   | 0.06   | 0.06   | 0.06   | 0.06   | 0.06   | 0.07   | 0.07   | 0.07   | 0.07   | 0.07   | 0.07   | 0.07   | 0.07   | 0.07   | 0.07   | 0.07   | 0.06   | 0.06   |
| 0.06   | 0.07   | 0.06   | 0.05   | 0.06   | 0.05   | 0.06   | 0.05   | 0.04   | 0.04   | 0.03   | 0.03   | 0.03   | 0.03   | 0.03   | 0.02   | 0.03   | 0.04   | 0.03   | 0.04   | 0.05   | 0.05   | 0.05   | 0.05   | 0.05   | 0.06   | 0.06   | 0.06   | 0.06   | 0.06   | 0.06   | 0.06   | 0.06   | 0.06   | 0.06   | 0.06   | 0.06   | 0.06   | 0.05   | 0.05   |
| 0.06   | 0.06   | 0.06   | 0.07   | 0.05   | 0.05   | 0.04   | 0.05   | 0.05   | 0.05   | 0.05   | 0.05   | 0.04   | 0.04   | 0.03   | 0.03   | 0.03   | 0.03   | 0.02   | 0.02   | 0.03   | 0.03   | 0.04   | 0.04   | 0.04   | 0.03   | 0.03   | 0.04   | 0.05   | 0.05   | 0.04   | 0.06   | 0.05   | 0.07   | 0.05   | 0.07   | 0.06   | 0.05   | 0.05   |        |
| 0.08   | 0.07   | 0.06   | 0.07   | 0.06   | 0.06   | 0.05   | 0.05   | 0.05   | 0.05   | 0.04   | 0.04   | 0.04   | 0.04   | 0.04   | 0.02   | 0.04   | 0.02   | 0.04   | 0.03   | 0.03   | 0.03   | 0.03   | 0.03   | 0.04   | 0.06   | 0.05   | 0.05   | 0.06   | 0.06   | 0.06   | 0.06   | 0.06   | 0.06   | 0.06   | 0.06   | 0.06   | 0.06   | 0.05   | 0.05   |
| 0.12   | 0.11   | 0.12   | 0.10   | 0.11   | 0.11   | 0.10   | 0.10   | 0.10   | 0.10   | 0.08   | 0.08   | 0.09   | 0.07   | 0.07   | 0.06   | 0.06   | 0.06   | 0.07   | 0.07   | 0.06   | 0.07   | 0.07   | 0.08   | 0.09   | 0.09   | 0.09   | 0.08   | 0.08   | 0.09   | 0.09   | 0.08   | 0.08   | 0.09   | 0.10   | 0.11   | 0.12   | 0.11   | 0.10   | 0.10   |
| 0.11   | 0.11   | 0.11   | 0.10   | 0.09   | 0.09   | 0.08   | 0.08   | 0.08   | 0.08   | 0.06   | 0.05   | 0.05   | 0.03   | 0.04   | 0.04   | 0.04   | 0.05   | 0.05   | 0.05   | 0.04   | 0.05   | 0.05   | 0.05   | 0.06   | 0.07   | 0.07   | 0.07   | 0.08   | 0.08   | 0.08   | 0.09   | 0.12   | 0.12   | 0.11   | 0.10   | 0.09   | 0.08   |        |        |
| 0.05   | 0.04   | 0.04   | 0.05   | 0.03   | 0.03   | 0.03   | 0.03   | 0.03   | 0.03   | 0.02   | 0.04   | 0.03   | 0.03   | 0.01   | 0.01   | 0.02   | 0.02   | 0.03   | 0.03   | 0.04   | 0.03   | 0.05   | 0.05   | 0.04   | 0.03   | 0.05   | 0.05   | 0.05   | 0.04   | 0.05   | 0.06   | 0.06   | 0.06   | 0.06   | 0.04   | 0.04   | 0.04   | 0.04   |        |
| 0.13   | 0.12   | 0.11   | 0.10   | 0.10   | 0.09   | 0.09   | 0.08   | 0.08   | 0.08   | 0.06   | 0.05   | 0.05   | 0.05   | 0.05   | 0.05   | 0.05   | 0.05   | 0.05   | 0.05   | 0.05   | 0.05   | 0.05   | 0.05   | 0.05   | 0.05   | 0.05   | 0.05   | 0.05   | 0.05   | 0.05   | 0.05   | 0.05   | 0.05   | 0.05   | 0.05   | 0.05   | 0.05   | 0.05   | 0.05   |
| 0.08   | 0.08   | 0.07   | 0.06   | 0.06   | 0.05   | 0.05   | 0.05   | 0.05   | 0.05   | 0.04   | 0.03   | 0.04   | 0.03   | 0.04   | 0.05   | 0.04   | 0.04   | 0.04   | 0.04   | 0.04   | 0.04   | 0.04   | 0.04   | 0.05   | 0.05   | 0.05   | 0.04   | 0.05   | 0.04   | 0.06   | 0.06   | 0.07   | 0.06   | 0.06   | 0.06   | 0.06   | 0.06   | 0.05   | 0.05   |
| 0.10   | 0.10   | 0.09   | 0.08   | 0.09   | 0.09   | 0.07   | 0.07   | 0.08   | 0.06   | 0.07   | 0.06   | 0.05   | 0.06   | 0.06   | 0.05   | 0.06   | 0.05   | 0.06   | 0.05   | 0.06   | 0.07   | 0.06   | 0.07   | 0.06   | 0.07   | 0.08   | 0.08   | 0.09   | 0.10   | 0.10   | 0.09   | 0.09   | 0.09   | 0.09   | 0.08   | 0.08   | 0.08   | 0.09   |        |
| 0.09   | 0.08   | 0.09   | 0.08   | 0.08   | 0.06   | 0.06   | 0.07   | 0.05   | 0.06   | 0.06   | 0.04   | 0.05   | 0.04   | 0.03   | 0.04   | 0.05   | 0.04   | 0.04   | 0.06   | 0.04   | 0.05   | 0.04   | 0.05   | 0.05   | 0.06   | 0.06   | 0.06   | 0.06   | 0.06   | 0.06   | 0.06   | 0.06   | 0.06   | 0.06   | 0.06   | 0.06   | 0.06   | 0.06   | 0.06   |
| 0.17   | 0.16   | 0.16   | 0.16   | 0.13   | 0.14   | 0.14   | 0.14   | 0.14   | 0.12   | 0.11   | 0.11   | 0.10   | 0.10   | 0.10   | 0.10   | 0.09   | 0.08   | 0.09   | 0.09   | 0.10   | 0.09   | 0.10   | 0.09   | 0.09   | 0.10   | 0.09   | 0.11   | 0.11   | 0.13   | 0.12   | 0.14   | 0.12   | 0.14   | 0.13   | 0.15   | 0.15   | 0.13   | 0.12   |        |
| 0.11   | 0.11   | 0.11   | 0.09   | 0.09   | 0.09   | 0.08   | 0.09   | 0.09   | 0.07   | 0.07   | 0.07   | 0.06   | 0.06   | 0.06   | 0.06   | 0.06   | 0.06   | 0.06   | 0.07   | 0.07   | 0.07   | 0.08   | 0.08   | 0.08   | 0.08   | 0.08   | 0.07   | 0.09   | 0.09   | 0.10   | 0.09   | 0.10   | 0.09   | 0.10   | 0.09   | 0.09   | 0.09   | 0.08   |        |
| 0.09   | 0.10   | 0.09   | 0.09   | 0.09   | 0.08   | 0.07   | 0.08   | 0.07   | 0.06   | 0.06   | 0.06   | 0.06   | 0.06   | 0.06   | 0.06   | 0.06   | 0.06   | 0.06   | 0.07   | 0.08   | 0.07   | 0.08   | 0.07   | 0.08   | 0.07   | 0.08   | 0.08   | 0.09   | 0.10   | 0.10   | 0.12   | 0.11   | 0.12   | 0.13   | 0.13   | 0.13   | 0.14   | 0.12   | 0.11   |
| 0.14   | 0.14   | 0.12   | 0.11   | 0.11   | 0.11   | 0.11   | 0.11   | 0.12   | 0.11   | 0.10   | 0.10   | 0.10   | 0.10   | 0.10   | 0.08   | 0.09   | 0.08   | 0.08   | 0.08   | 0.08   | 0.08   | 0.08   | 0.09   | 0.09   | 0.09   | 0.09   | 0.10   | 0.10   | 0.11   | 0.11   | 0.13   | 0.14   | 0.13   | 0.13   | 0.13   | 0.13   | 0.13   | 0.12   | 0.12   |
| 0.10   | 0.11   | 0.10   | 0.09   | 0.08   | 0.08   | 0.08   | 0.07   | 0.08   | 0.07   | 0.06   | 0.05   | 0.04   | 0.03   | 0.05   | 0.04   | 0.03   | 0.05   | 0.04   | 0.05   | 0.04   | 0.06   | 0.07   | 0.07   | 0.06   | 0.07   | 0.09   | 0.09   | 0.10   | 0.10   | 0.11   | 0.11   | 0.11   | 0.11   | 0.11   | 0.11   | 0.11   | 0.09   | 0.09   |        |

| June13 |
|--------|--------|--------|--------|--------|--------|--------|--------|--------|--------|--------|--------|--------|--------|--------|--------|--------|--------|--------|--------|--------|--------|--------|--------|--------|--------|--------|--------|--------|--------|--------|--------|--------|--------|--------|--------|--------|--------|--------|--------|
| -0.15  | -0.16  | -0.13  | -0.15  | -0.15  | -0.15  | -0.15  | -0.22  | -0.25  | -0.29  | -0.31  | -0.30  | -0.31  | -0.28  | -0.26  | -0.22  | -0.19  | -0.17  | -0.15  | -0.12  | -0.08  | -0.07  | -0.06  | -0.08  | -0.04  | -0.05  | -0.08  | -0.07  | -0.03  | -0.10  | -0.17  | -0.22  | -0.30  | -0.34  | -0.34  | -0.35  | -0.34  | -0.31  | -0.30  |        |
| -0.04  | -0.06  | -0.04  | -0.05  | -0.06  | -0.05  | -0.06  | -0.06  | -0.07  | -0.06  | -0.03  | -0.07  | -0.04  | -0.05  | -0.06  | -0.01  | -0.04  | -0.01  | 0.00   | -0.01  | 0.01   | 0.00   | 0.00   | 0.01   | 0.00   | 0.02   | 0.01   | 0.00   | 0.02   | 0.01   | 0.00   | -0.02  | -0.02  | -0.03  | -0.03  | -0.06  | -0.05  | -0.06  | -0.08  |        |
| -0.02  | -0.01  | 0.00   | -0.02  | -0.02  | 0.00   | -0.04  | -0.02  | -0.02  | 0.00   | -0.01  | 0.02   | 0.01   | 0.00   | 0.01   | 0.00   | 0.00   | 0.02   | 0.02   | 0.01   | 0.02   | 0.02   | 0.01   | 0.02   | 0.03   | 0.00   | 0.02   | 0.03   | 0.00   | 0.02   | 0.03   | 0.00   | 0.02   | 0.04   | 0.03   | 0.00   | -0.02  | 0.00   | 0.01   |        |
| 0.03   | -0.01  | 0.02   | 0.02   | 0.02   | -0.01  | 0.01   | 0.01   | 0.03   | 0.02   | 0.02   | 0.01   | 0.01   | 0.01   | 0.04   | 0.00   | 0.04   | 0.04   | 0.03   | 0.04   | 0.02   | 0.03   | 0.02   | 0.05   | 0.03   | 0.05   | 0.04   | 0.05   | 0.05   | 0.03   | 0.03   | 0.04   | 0.04   | 0.04   | 0.04   | 0.03   | 0.03   | 0.03   | 0.01   |        |
| 0.03   | 0.01   | 0.03   | 0.03   | 0.02   | 0.02   | 0.02   | 0.00   | 0.00   | 0.01   | 0.00   | 0.01   | 0.00   | 0.01   | 0.01   | 0.02   | 0.02   | 0.01   | 0.02   | 0.00   | 0.03   | 0.04   | 0.06   | 0.01   | 0.06   | 0.04   | 0.02   | 0.05   | 0.     |        |        |        |        |        |        |        |        |        |        |        |



|       | Dec17   |
|-------|---------|---------|---------|---------|---------|---------|---------|---------|---------|---------|---------|---------|---------|---------|---------|---------|---------|---------|
| Joint | Opening |
| I1    | -0.34   | -0.34   | -0.35   | -0.34   | -0.31   | -0.30   | -0.32   | -0.33   | -0.36   | -0.36   | -0.37   | -0.37   | -0.37   | -0.38   | -0.38   | -0.38   | -0.34   | -0.33   |
| D11   | -0.98   | -0.99   | -1.00   | -0.98   | -0.86   | -0.85   | -0.87   | -0.92   | -0.98   | -1.01   | -1.03   | -1.02   | -1.02   | -1.03   | -1.04   | -1.02   | -0.92   | -0.88   |
| D12   | -0.35   | -0.35   | -0.35   | -0.35   | -0.35   | -0.35   | -0.36   | -0.36   | -0.36   | -0.35   | -0.36   | -0.36   | -0.36   | -0.37   | -0.37   | -0.37   | -0.38   | -0.38   |
| D13   | -0.40   | -0.41   | -0.41   | -0.41   | -0.41   | -0.42   | -0.42   | -0.42   | -0.42   | -0.42   | -0.41   | -0.41   | -0.42   | -0.42   | -0.42   | -0.43   | -0.43   | -0.43   |
| D14   | -0.34   | -0.33   | -0.33   | -0.33   | -0.34   | -0.34   | -0.34   | -0.34   | -0.34   | -0.34   | -0.34   | -0.34   | -0.35   | -0.35   | -0.35   | -0.35   | -0.36   | -0.36   |
| D15   | -0.28   | -0.28   | -0.28   | -0.29   | -0.29   | -0.29   | -0.29   | -0.29   | -0.29   | -0.29   | -0.28   | -0.29   | -0.29   | -0.29   | -0.29   | -0.29   | -0.30   | -0.31   |
| I2    | -0.31   | -0.31   | -0.31   | -0.31   | -0.32   | -0.33   | -0.34   | -0.34   | -0.35   | -0.34   | -0.34   | -0.34   | -0.35   | -0.35   | -0.34   | -0.35   | -0.36   | -0.37   |
| D21   | -0.32   | -0.32   | -0.32   | -0.32   | -0.32   | -0.32   | -0.32   | -0.32   | -0.32   | -0.32   | -0.32   | -0.32   | -0.33   | -0.33   | -0.33   | -0.34   | -0.33   | -0.34   |
| D22   | -0.34   | -0.34   | -0.34   | -0.34   | -0.34   | -0.35   | -0.35   | -0.36   | -0.35   | -0.35   | -0.35   | -0.35   | -0.36   | -0.36   | -0.36   | -0.36   | -0.36   | -0.37   |
| D23   | -0.35   | -0.34   | -0.34   | -0.34   | -0.34   | -0.34   | -0.34   | -0.34   | -0.34   | -0.35   | -0.34   | -0.35   | -0.35   | -0.35   | -0.35   | -0.36   | -0.36   | -0.36   |
| D24   | -0.41   | -0.41   | -0.40   | -0.40   | -0.39   | -0.40   | -0.40   | -0.41   | -0.41   | -0.41   | -0.41   | -0.41   | -0.41   | -0.42   | -0.42   | -0.42   | -0.41   | -0.42   |
| D25   | -0.42   | -0.42   | -0.42   | -0.42   | -0.41   | -0.41   | -0.42   | -0.42   | -0.43   | -0.43   | -0.43   | -0.43   | -0.44   | -0.44   | -0.44   | -0.44   | -0.43   | -0.43   |
| I3    | -0.44   | -0.44   | -0.44   | -0.43   | -0.39   | -0.40   | -0.41   | -0.44   | -0.46   | -0.45   | -0.46   | -0.45   | -0.46   | -0.45   | -0.47   | -0.45   | -0.42   | -0.42   |

|       | Dec17     |
|-------|-----------|-----------|-----------|-----------|-----------|-----------|-----------|-----------|-----------|-----------|-----------|-----------|-----------|-----------|-----------|-----------|-----------|-----------|
| Joint | Settlemen |
| I1    | 0.11      | 0.13      | 0.14      | 0.07      | -0.10     | -0.13     | -0.12     | -0.08     | 0.01      | 0.06      | 0.08      | 0.07      | 0.06      | 0.08      | 0.08      | 0.04      | -0.12     | -0.18     |
| D11   | 0.11      | 0.11      | 0.11      | 0.12      | 0.11      | 0.11      | 0.10      | 0.10      | 0.09      | 0.10      | 0.10      | 0.10      | 0.10      | 0.09      | 0.10      | 0.11      | 0.11      | 0.11      |
| D12   | -0.03     | -0.02     | -0.02     | -0.02     | -0.03     | -0.03     | -0.03     | -0.03     | -0.03     | -0.02     | -0.02     | -0.02     | -0.02     | -0.02     | -0.04     | -0.03     | -0.04     | -0.04     |
| D13   | -0.05     | -0.05     | -0.04     | -0.05     | -0.06     | -0.06     | -0.06     | -0.06     | -0.06     | -0.05     | -0.05     | -0.05     | -0.05     | -0.05     | -0.05     | -0.06     | -0.06     | -0.07     |
| D14   | -0.10     | -0.09     | -0.11     | -0.11     | -0.11     | -0.11     | -0.11     | -0.11     | -0.11     | -0.11     | -0.10     | -0.11     | -0.11     | -0.11     | -0.11     | -0.11     | -0.12     | -0.12     |
| D15   | -0.02     | -0.02     | -0.02     | -0.02     | -0.04     | -0.04     | -0.04     | -0.04     | -0.03     | -0.02     | -0.02     | -0.02     | -0.02     | -0.03     | -0.02     | -0.03     | -0.04     | -0.04     |
| I2    | -0.02     | -0.01     | -0.01     | -0.01     | -0.01     | -0.02     | -0.02     | -0.02     | -0.02     | -0.01     | -0.02     | -0.01     | -0.03     | -0.02     | -0.02     | -0.02     | -0.02     | -0.02     |
| D21   | -0.05     | -0.05     | -0.04     | -0.05     | -0.06     | -0.06     | -0.05     | -0.06     | -0.05     | -0.05     | -0.06     | -0.06     | -0.06     | -0.05     | -0.06     | -0.06     | -0.06     | -0.06     |
| D22   | -0.05     | -0.04     | -0.05     | -0.05     | -0.06     | -0.06     | -0.06     | -0.06     | -0.06     | -0.05     | -0.05     | -0.05     | -0.05     | -0.05     | -0.05     | -0.05     | -0.06     | -0.07     |
| D23   | -0.03     | -0.03     | -0.04     | -0.03     | -0.04     | -0.04     | -0.04     | -0.03     | -0.04     | -0.03     | -0.03     | -0.03     | -0.02     | -0.03     | -0.03     | -0.03     | -0.04     | -0.04     |
| D24   | -0.10     | -0.09     | -0.10     | -0.11     | -0.11     | -0.10     | -0.10     | -0.10     | -0.10     | -0.10     | -0.10     | -0.10     | -0.11     | -0.10     | -0.11     | -0.11     | -0.12     | -0.12     |
| D25   | 0.01      | 0.00      | 0.00      | 0.01      | -0.01     | -0.01     | 0.00      | 0.00      | 0.00      | 0.00      | 0.00      | 0.00      | 0.01      | 0.01      | 0.00      | 0.00      | 0.00      | 0.00      |
| I3    | -0.03     | -0.03     | -0.02     | -0.02     | -0.05     | -0.07     | -0.06     | -0.06     | -0.06     | -0.05     | -0.05     | -0.04     | -0.05     | -0.04     | -0.04     | -0.04     | -0.06     | -0.07     |

|       | Dec17 |
|-------|-------|-------|-------|-------|-------|-------|-------|-------|-------|-------|-------|-------|-------|-------|-------|-------|-------|-------|
| Joint | Tem.  |
| I1    | 11.32 | 11.25 | 11.26 | 11.33 | 11.29 | 11.00 | 11.34 | 11.49 | 11.79 | 11.64 | 12.03 | 12.13 | 12.55 | 12.77 | 12.83 | 12.62 | 12.41 | 11.92 |
| D11   | 12.79 | 12.61 | 12.80 | 12.66 | 12.70 | 12.54 | 12.67 | 12.71 | 13.06 | 12.90 | 13.07 | 13.35 | 13.35 | 13.81 | 13.78 | 13.88 | 13.63 | 13.39 |
| D12   | 12.13 | 12.00 | 11.99 | 11.92 | 11.85 | 11.43 | 11.56 | 11.73 | 11.87 | 11.63 | 11.92 | 12.18 | 12.56 | 12.94 | 13.16 | 13.15 | 13.03 | 12.87 |
| D13   | 11.85 | 11.79 | 11.86 | 11.75 | 11.74 | 11.56 | 11.56 | 11.74 | 11.94 | 11.82 | 12.00 | 12.25 | 12.53 | 12.89 | 12.94 | 12.92 | 12.67 | 12.54 |
| D14   | 12.57 | 12.46 | 12.51 | 12.47 | 12.41 | 12.20 | 12.27 | 12.26 | 12.50 | 12.42 | 12.72 | 13.13 | 13.34 | 13.78 | 13.69 | 13.74 | 13.62 | 13.35 |
| D15   | 12.30 | 12.29 | 12.34 | 12.18 | 12.30 | 12.09 | 12.14 | 12.19 | 12.37 | 12.17 | 12.32 | 12.68 | 12.86 | 13.20 | 13.17 | 13.26 | 13.12 | 13.06 |
| I2    | 10.81 | 10.72 | 10.76 | 10.53 | 10.62 | 10.49 | 10.61 | 10.62 | 10.97 | 10.79 | 11.17 | 11.33 | 11.79 | 12.05 | 11.99 | 12.10 | 11.91 | 11.59 |
| D21   | 11.73 | 11.51 | 11.36 | 11.38 | 11.43 | 11.24 | 11.09 | 11.26 | 11.35 | 11.28 | 11.59 | 12.03 | 12.17 | 12.49 | 12.66 | 12.71 | 12.49 | 12.47 |
| D22   | 12.09 | 11.96 | 12.07 | 11.98 | 12.11 | 11.78 | 11.94 | 12.06 | 12.10 | 12.04 | 12.36 | 12.62 | 12.91 | 13.18 | 13.29 | 13.04 | 12.99 | 12.83 |
| D23   | 12.01 | 11.95 | 11.83 | 11.74 | 11.85 | 11.43 | 11.63 | 11.45 | 11.68 | 11.60 | 11.66 | 12.16 | 12.29 | 12.72 | 12.80 | 12.87 | 12.84 | 12.81 |
| D24   | 12.27 | 12.15 | 12.11 | 12.03 | 12.07 | 11.85 | 11.82 | 11.87 | 12.07 | 11.89 | 12.28 | 12.61 | 12.92 | 13.15 | 13.25 | 13.33 | 13.13 | 13.06 |
| D25   | 12.02 | 12.03 | 11.98 | 11.94 | 11.99 | 11.71 | 11.91 | 11.83 | 12.22 | 12.17 | 12.52 | 12.69 | 12.98 | 13.09 | 13.22 | 13.29 | 12.91 | 12.79 |
| I3    | 11.73 | 11.63 | 11.67 | 11.53 | 11.61 | 11.38 | 11.23 | 11.40 | 11.60 | 11.42 | 11.84 | 12.12 | 12.40 | 12.61 | 12.81 | 12.76 | 12.53 | 12.34 |

| Dec17   | Dec17   | Dec17   | Dec17   | Dec17   | Dec17   | Dec18   |         |
|---------|---------|---------|---------|---------|---------|---------|---------|---------|---------|---------|---------|---------|---------|---------|---------|---------|---------|---------|---------|---------|
| Opening |
| -0.33   | -0.33   | -0.34   | -0.35   | -0.35   | -0.34   | -0.34   | -0.33   | -0.33   | -0.32   | -0.30   | -0.28   | -0.27   | -0.28   | -0.31   | -0.33   | -0.35   | -0.37   | -0.39   | -0.39   |         |
| -0.90   | -0.93   | -0.97   | -1.02   | -1.04   | -1.04   | -1.04   | -1.05   | -1.04   | -1.05   | -1.00   | -0.90   | -0.89   | -0.91   | -0.95   | -1.01   | -1.05   | -1.08   | -1.09   | -1.09   |         |
| -0.38   | -0.38   | -0.38   | -0.37   | -0.37   | -0.36   | -0.36   | -0.36   | -0.36   | -0.36   | -0.36   | -0.35   | -0.35   | -0.35   | -0.35   | -0.36   | -0.36   | -0.36   | -0.36   | -0.37   |         |
| -0.44   | -0.44   | -0.44   | -0.43   | -0.43   | -0.42   | -0.42   | -0.42   | -0.42   | -0.42   | -0.42   | -0.41   | -0.41   | -0.41   | -0.41   | -0.41   | -0.41   | -0.41   | -0.41   | -0.42   |         |
| -0.37   | -0.37   | -0.37   | -0.37   | -0.36   | -0.36   | -0.36   | -0.36   | -0.36   | -0.35   | -0.35   | -0.34   | -0.34   | -0.34   | -0.34   | -0.34   | -0.34   | -0.34   | -0.34   | -0.35   |         |
| -0.31   | -0.31   | -0.31   | -0.31   | -0.31   | -0.30   | -0.30   | -0.30   | -0.29   | -0.29   | -0.29   | -0.29   | -0.29   | -0.28   | -0.27   | -0.28   | -0.28   | -0.28   | -0.28   | -0.28   |         |
| -0.38   | -0.39   | -0.40   | -0.39   | -0.39   | -0.37   | -0.37   | -0.37   | -0.36   | -0.35   | -0.35   | -0.34   | -0.35   | -0.35   | -0.37   | -0.37   | -0.37   | -0.37   | -0.38   | -0.38   |         |
| -0.34   | -0.34   | -0.35   | -0.34   | -0.34   | -0.34   | -0.33   | -0.33   | -0.33   | -0.33   | -0.32   | -0.32   | -0.31   | -0.31   | -0.32   | -0.32   | -0.32   | -0.32   | -0.33   | -0.33   |         |
| -0.37   | -0.37   | -0.37   | -0.37   | -0.37   | -0.36   | -0.35   | -0.35   | -0.35   | -0.35   | -0.34   | -0.34   | -0.34   | -0.34   | -0.34   | -0.34   | -0.35   | -0.35   | -0.35   | -0.36   |         |
| -0.36   | -0.37   | -0.37   | -0.37   | -0.36   | -0.36   | -0.36   | -0.36   | -0.35   | -0.35   | -0.35   | -0.35   | -0.34   | -0.34   | -0.35   | -0.35   | -0.35   | -0.36   | -0.36   | -0.36   |         |
| -0.42   | -0.43   | -0.43   | -0.43   | -0.43   | -0.42   | -0.42   | -0.42   | -0.41   | -0.41   | -0.41   | -0.40   | -0.39   | -0.40   | -0.41   | -0.41   | -0.41   | -0.42   | -0.42   | -0.42   |         |
| -0.44   | -0.44   | -0.44   | -0.44   | -0.44   | -0.43   | -0.42   | -0.42   | -0.42   | -0.42   | -0.40   | -0.39   | -0.39   | -0.40   | -0.41   | -0.42   | -0.42   | -0.43   | -0.44   | -0.44   |         |
| -0.44   | -0.46   | -0.48   | -0.50   | -0.50   | -0.48   | -0.48   | -0.48   | -0.47   | -0.46   | -0.43   | -0.40   | -0.41   | -0.43   | -0.45   | -0.47   | -0.48   | -0.48   | -0.49   | -0.49   |         |

| Dec17     | Dec17     | Dec17     | Dec17     | Dec17     | Dec17     | Dec18     |
|-----------|-----------|-----------|-----------|-----------|-----------|-----------|-----------|-----------|-----------|-----------|-----------|-----------|-----------|-----------|-----------|-----------|-----------|-----------|-----------|
| Settlemen |
| -0.18     | -0.13     | -0.09     | -0.02     | 0.01      | 0.02      | 0.03      | 0.05      | 0.05      | 0.05      | 0.00      | -0.12     | -0.15     | -0.12     | -0.07     | 0.01      | 0.05      | 0.10      | 0.08      | 0.08      |
| 0.11      | 0.11      | 0.10      | 0.10      | 0.12      | 0.13      | 0.13      | 0.13      | 0.12      | 0.13      | 0.14      | 0.14      | 0.14      | 0.13      | 0.11      | 0.11      | 0.10      | 0.10      | 0.10      | 0.09      |
| -0.04     | -0.04     | -0.03     | -0.03     | -0.03     | -0.02     | -0.02     | -0.02     | -0.02     | -0.02     | -0.02     | -0.02     | -0.03     | -0.03     | -0.02     | -0.02     | -0.02     | -0.02     | -0.02     | -0.02     |
| -0.07     | -0.06     | -0.05     | -0.05     | -0.05     | -0.04     | -0.04     | -0.04     | -0.05     | -0.04     | -0.04     | -0.05     | -0.04     | -0.05     | -0.04     | -0.04     | -0.04     | -0.04     | -0.04     | -0.04     |
| -0.12     | -0.11     | -0.11     | -0.10     | -0.09     | -0.10     | -0.10     | -0.09     | -0.10     | -0.10     | -0.10     | -0.10     | -0.10     | -0.10     | -0.10     | -0.09     | -0.10     | -0.10     | -0.10     | -0.10     |
| -0.05     | -0.04     | -0.04     | -0.03     | -0.02     | -0.02     | -0.03     | -0.03     | -0.02     | -0.03     | -0.03     | -0.04     | -0.04     | -0.03     | -0.04     | -0.02     | -0.02     | -0.01     | -0.02     | -0.02     |
| -0.02     | -0.01     | -0.02     | -0.01     | -0.01     | -0.01     | -0.01     | 0.00      | 0.00      | 0.00      | 0.00      | 0.00      | 0.00      | 0.01      | 0.00      | -0.01     | 0.00      | -0.01     | -0.01     | -0.02     |
| -0.07     | -0.07     | -0.06     | -0.06     | -0.06     | -0.06     | -0.04     | -0.06     | -0.06     | -0.05     | -0.05     | -0.06     | -0.06     | -0.06     | -0.05     | -0.05     | -0.05     | -0.05     | -0.05     | -0.06     |
| -0.07     | -0.06     | -0.06     | -0.05     | -0.05     | -0.06     | -0.05     | -0.05     | -0.04     | -0.04     | -0.05     | -0.06     | -0.06     | -0.05     | -0.05     | -0.04     | -0.04     | -0.04     | -0.04     | -0.04     |
| -0.04     | -0.04     | -0.04     | -0.03     | -0.03     | -0.03     | -0.02     | -0.03     | -0.03     | -0.02     | -0.03     | -0.03     | -0.03     | -0.03     | -0.02     | -0.03     | -0.03     | -0.02     | -0.02     | -0.03     |
| -0.11     | -0.11     | -0.11     | -0.11     | -0.11     | -0.11     | -0.11     | -0.10     | -0.11     | -0.10     | -0.11     | -0.10     | -0.10     | -0.10     | -0.10     | -0.10     | -0.10     | -0.10     | -0.10     | -0.11     |
| 0.00      | -0.01     | 0.01      | 0.01      | 0.02      | 0.01      | 0.00      | 0.01      | 0.01      | 0.01      | 0.00      | 0.00      | 0.00      | 0.00      | 0.01      | 0.02      | 0.01      | 0.02      | 0.02      | 0.02      |
| -0.08     | -0.08     | -0.07     | -0.06     | -0.06     | -0.06     | -0.06     | -0.05     | -0.05     | -0.05     | -0.05     | -0.06     | -0.07     | -0.07     | -0.07     | -0.06     | -0.05     | -0.04     | -0.03     | -0.03     |

| Dec17 | Dec17 | Dec17 | Dec17 | Dec17 | Dec17 | Dec18 |      |
|-------|-------|-------|-------|-------|-------|-------|-------|-------|-------|-------|-------|-------|-------|-------|-------|-------|-------|-------|-------|------|
| Tem.  | Tem. |
| 11.69 | 11.13 | 11.49 | 10.97 | 10.61 | 9.98  | 9.72  | 9.51  | 9.37  | 9.05  | 8.57  | 8.37  | 8.20  | 8.54  | 10.11 | 10.56 | 11.15 | 12.09 | 13.31 | 13.31 |      |
| 13.15 | 12.87 | 13.15 | 12.93 | 12.60 | 12.09 | 11.89 | 11.81 | 11.60 | 11.59 | 11.26 | 10.81 | 10.64 | 10.73 | 11.77 | 12.05 | 12.60 | 13.18 | 13.91 | 13.91 |      |
| 12.44 | 12.33 | 12.29 | 12.12 | 11.91 | 11.31 | 11.28 | 11.06 | 11.08 | 11.04 | 10.57 | 10.16 | 10.28 | 10.36 | 11.49 | 11.78 | 12.24 | 13.07 | 13.81 | 13.81 |      |
| 12.40 | 12.12 | 12.25 | 11.89 | 11.73 | 11.17 | 11.12 | 11.00 | 10.90 | 10.79 | 10.32 | 10.13 | 9.94  | 10.03 | 11.02 | 11.29 | 11.67 | 12.28 | 13.00 | 13.00 |      |
| 13.17 | 12.95 | 13.05 | 12.80 | 12.48 | 12.04 | 11.97 | 11.83 | 11.63 | 11.47 | 11.05 | 10.91 | 10.64 | 10.82 | 11.77 | 11.98 | 12.37 | 13.06 | 13.79 | 13.79 |      |
| 12.83 | 12.52 | 12.83 | 12.65 | 12.40 | 11.90 | 11.77 | 11.88 | 11.67 | 11.58 | 11.32 | 11.20 | 10.90 | 10.86 | 11.55 | 11.87 | 12.22 | 12.65 | 13.40 | 13.40 |      |
| 11.27 | 10.87 | 11.24 | 10.76 | 10.49 | 9.85  | 9.71  | 9.61  | 9.33  | 9.13  | 8.79  | 8.60  | 8.40  | 8.71  | 9.94  | 10.34 | 10.93 | 11.75 | 12.71 | 12.71 |      |
| 12.17 | 12.00 | 12.12 | 11.92 | 11.56 | 11.17 | 10.96 | 11.03 | 10.99 | 10.77 | 10.19 | 10.00 | 9.82  | 10.01 | 10.78 | 11.20 | 11.61 | 12.21 | 12.93 | 12.93 |      |
| 12.63 | 12.30 | 12.64 | 12.22 | 11.98 | 11.72 | 11.14 | 11.25 | 10.98 | 10.85 | 10.44 | 10.37 | 10.32 | 10.27 | 11.22 | 11.52 | 12.03 | 12.63 | 13.44 | 13.44 |      |
| 12.54 | 12.23 | 12.48 | 11.98 | 11.69 | 11.45 | 11.08 | 11.13 | 10.85 | 10.71 | 10.38 | 10.34 | 10.14 | 10.08 | 11.29 | 11.70 | 11.84 | 12.37 | 13.47 | 13.47 |      |
| 12.77 | 12.51 | 12.57 | 12.36 | 12.15 | 11.62 | 11.49 | 11.34 | 11.34 | 11.13 | 10.86 | 10.55 | 10.48 | 10.50 | 11.42 | 11.71 | 12.28 | 12.92 | 13.74 | 13.74 |      |
| 12.63 | 12.30 | 12.40 | 11.97 | 11.81 | 11.42 | 11.26 | 11.08 | 10.84 | 10.66 | 10.22 | 10.07 | 9.84  | 10.21 | 11.16 | 11.42 | 11.93 | 12.64 | 13.52 | 13.52 |      |
| 12.31 | 11.76 | 11.97 | 11.61 | 11.60 | 11.09 | 11.02 | 10.82 | 10.56 | 10.40 | 9.84  | 9.81  | 9.76  | 9.93  | 10.84 | 11.04 | 11.59 | 12.28 | 13.08 | 13.08 |      |

| Dec18   | Dec19   |
|---------|---------|---------|---------|---------|---------|---------|---------|---------|---------|---------|---------|---------|---------|---------|---------|---------|---------|---------|---------|
| Opening |
| -0.40   | -0.41   | -0.41   | -0.40   | -0.35   | -0.34   | -0.35   | -0.34   | -0.34   | -0.35   | -0.35   | -0.35   | -0.35   | -0.35   | -0.35   | -0.35   | -0.34   | -0.31   | -0.30   | -0.31   |
| -1.10   | -1.14   | -1.15   | -1.14   | -1.03   | -1.01   | -1.04   | -1.08   | -1.12   | -1.15   | -1.16   | -1.16   | -1.15   | -1.17   | -1.18   | -1.18   | -1.17   | -1.09   | -1.02   | -1.03   |
| -0.38   | -0.39   | -0.39   | -0.39   | -0.39   | -0.39   | -0.40   | -0.39   | -0.39   | -0.38   | -0.38   | -0.38   | -0.37   | -0.37   | -0.37   | -0.37   | -0.36   | -0.36   | -0.37   | -0.37   |
| -0.43   | -0.43   | -0.44   | -0.44   | -0.44   | -0.45   | -0.45   | -0.45   | -0.45   | -0.44   | -0.44   | -0.44   | -0.43   | -0.43   | -0.43   | -0.43   | -0.42   | -0.42   | -0.43   | -0.43   |
| -0.35   | -0.36   | -0.37   | -0.37   | -0.37   | -0.38   | -0.38   | -0.38   | -0.38   | -0.37   | -0.37   | -0.37   | -0.37   | -0.37   | -0.36   | -0.36   | -0.35   | -0.35   | -0.35   | -0.36   |
| -0.28   | -0.29   | -0.30   | -0.30   | -0.31   | -0.32   | -0.32   | -0.32   | -0.32   | -0.31   | -0.32   | -0.32   | -0.31   | -0.31   | -0.30   | -0.29   | -0.29   | -0.29   | -0.29   | -0.29   |
| -0.39   | -0.40   | -0.39   | -0.39   | -0.39   | -0.41   | -0.42   | -0.43   | -0.42   | -0.41   | -0.40   | -0.40   | -0.40   | -0.39   | -0.38   | -0.38   | -0.37   | -0.37   | -0.38   | -0.39   |
| -0.33   | -0.34   | -0.35   | -0.35   | -0.35   | -0.35   | -0.35   | -0.35   | -0.35   | -0.35   | -0.35   | -0.34   | -0.34   | -0.34   | -0.34   | -0.33   | -0.33   | -0.32   | -0.32   | -0.32   |
| -0.36   | -0.37   | -0.37   | -0.37   | -0.38   | -0.38   | -0.38   | -0.38   | -0.38   | -0.37   | -0.37   | -0.36   | -0.37   | -0.36   | -0.36   | -0.35   | -0.35   | -0.35   | -0.35   | -0.35   |
| -0.37   | -0.38   | -0.38   | -0.38   | -0.38   | -0.39   | -0.39   | -0.39   | -0.39   | -0.39   | -0.39   | -0.39   | -0.38   | -0.38   | -0.38   | -0.37   | -0.36   | -0.36   | -0.36   | -0.36   |
| -0.43   | -0.44   | -0.45   | -0.44   | -0.44   | -0.44   | -0.45   | -0.45   | -0.45   | -0.45   | -0.45   | -0.45   | -0.44   | -0.44   | -0.44   | -0.43   | -0.43   | -0.42   | -0.41   | -0.42   |
| -0.45   | -0.46   | -0.46   | -0.46   | -0.46   | -0.45   | -0.45   | -0.45   | -0.45   | -0.44   | -0.44   | -0.44   | -0.44   | -0.44   | -0.44   | -0.43   | -0.42   | -0.41   | -0.41   | -0.42   |
| -0.49   | -0.51   | -0.51   | -0.50   | -0.46   | -0.47   | -0.50   | -0.51   | -0.53   | -0.53   | -0.53   | -0.53   | -0.52   | -0.52   | -0.52   | -0.52   | -0.49   | -0.47   | -0.45   | -0.47   |

| Dec18     | Dec19     |
|-----------|-----------|-----------|-----------|-----------|-----------|-----------|-----------|-----------|-----------|-----------|-----------|-----------|-----------|-----------|-----------|-----------|-----------|-----------|-----------|
| Settlemen |
| 0.11      | 0.12      | 0.14      | 0.09      | -0.09     | -0.13     | -0.10     | -0.05     | 0.00      | 0.05      | 0.06      | 0.07      | 0.08      | 0.11      | 0.13      | 0.10      | -0.01     | -0.11     | -0.09     |           |
| 0.09      | 0.08      | 0.11      | 0.12      | 0.13      | 0.13      | 0.13      | 0.13      | 0.13      | 0.13      | 0.14      | 0.14      | 0.14      | 0.14      | 0.14      | 0.16      | 0.16      | 0.15      | 0.14      |           |
| -0.03     | -0.02     | -0.02     | -0.02     | -0.03     | -0.03     | -0.03     | -0.02     | -0.01     | -0.01     | -0.02     | -0.01     | -0.01     | -0.01     | 0.00      | 0.00      | -0.01     | -0.01     | -0.01     |           |
| -0.04     | -0.04     | -0.04     | -0.04     | -0.05     | -0.04     | -0.04     | -0.04     | -0.03     | -0.03     | -0.03     | -0.03     | -0.02     | -0.03     | -0.02     | -0.03     | -0.02     | -0.03     | -0.03     |           |
| -0.10     | -0.10     | -0.10     | -0.10     | -0.10     | -0.10     | -0.09     | -0.09     | -0.09     | -0.09     | -0.08     | -0.08     | -0.08     | -0.08     | -0.08     | -0.09     | -0.08     | -0.08     | -0.08     |           |
| -0.01     | -0.01     | -0.01     | -0.01     | -0.03     | -0.03     | -0.03     | -0.02     | -0.02     | -0.01     | -0.01     | -0.01     | -0.01     | -0.01     | -0.01     | -0.01     | -0.01     | -0.01     | -0.02     |           |
| -0.01     | -0.02     | -0.01     | -0.01     | 0.00      | 0.00      | 0.01      | 0.01      | 0.01      | 0.03      | 0.02      | 0.02      | 0.02      | 0.02      | 0.02      | 0.03      | 0.03      | 0.02      | 0.02      |           |
| -0.06     | -0.05     | -0.05     | -0.05     | -0.06     | -0.06     | -0.06     | -0.05     | -0.05     | -0.05     | -0.04     | -0.04     | -0.04     | -0.04     | -0.04     | -0.03     | -0.03     | -0.04     | -0.04     |           |
| -0.04     | -0.04     | -0.03     | -0.04     | -0.05     | -0.05     | -0.05     | -0.05     | -0.04     | -0.04     | -0.04     | -0.04     | -0.04     | -0.03     | -0.03     | -0.03     | -0.03     | -0.03     | -0.04     |           |
| -0.03     | -0.03     | -0.02     | -0.02     | -0.03     | -0.03     | -0.03     | -0.02     | -0.02     | -0.01     | -0.01     | -0.01     | -0.01     | -0.01     | -0.01     | -0.01     | -0.01     | -0.01     | -0.01     |           |
| -0.11     | -0.11     | -0.11     | -0.11     | -0.12     | -0.11     | -0.11     | -0.10     | -0.11     | -0.10     | -0.10     | -0.10     | -0.10     | -0.10     | -0.10     | -0.10     | -0.10     | -0.10     | -0.10     |           |
| 0.02      | 0.02      | 0.02      | 0.02      | 0.01      | 0.02      | 0.01      | 0.01      | 0.03      | 0.03      | 0.02      | 0.02      | 0.02      | 0.03      | 0.02      | 0.02      | 0.01      | 0.01      | 0.01      |           |
| -0.03     | -0.02     | -0.02     | -0.02     | -0.04     | -0.05     | -0.05     | -0.05     | -0.04     | -0.03     | -0.02     | -0.03     | -0.03     | -0.02     | -0.01     | -0.01     | -0.02     | -0.03     | -0.04     |           |

| Dec18 | Dec19 |
|-------|-------|-------|-------|-------|-------|-------|-------|-------|-------|-------|-------|-------|-------|-------|-------|-------|-------|-------|-------|
| Tem.  |
| 13.50 | 13.99 | 13.68 | 12.93 | 12.22 | 11.54 | 11.29 | 10.71 | 10.34 | 9.90  | 9.64  | 9.43  | 9.45  | 9.05  | 8.96  | 8.49  | 8.36  | 9.21  | 9.58  |       |
| 14.15 | 14.65 | 14.34 | 13.86 | 13.60 | 13.05 | 12.88 | 12.47 | 12.30 | 11.92 | 11.69 | 11.57 | 11.49 | 11.21 | 11.23 | 10.86 | 10.61 | 11.15 | 11.33 |       |
| 14.34 | 14.66 | 14.53 | 14.04 | 13.57 | 13.00 | 12.89 | 12.64 | 12.11 | 11.78 | 11.48 | 11.39 | 11.57 | 11.18 | 11.07 | 10.29 | 10.46 | 11.10 | 11.04 |       |
| 13.37 | 13.65 | 13.53 | 13.18 | 12.80 | 12.24 | 12.02 | 11.70 | 11.43 | 11.16 | 10.88 | 10.86 | 10.81 | 10.57 | 10.51 | 10.17 | 10.07 | 10.30 | 10.60 |       |
| 14.09 | 14.56 | 14.41 | 13.89 | 13.51 | 13.09 | 12.77 | 12.49 | 12.13 | 11.80 | 11.67 | 11.54 | 11.50 | 11.18 | 11.26 | 10.76 | 10.71 | 11.00 | 11.22 |       |
| 13.52 | 13.97 | 13.81 | 13.52 | 13.25 | 12.94 | 12.73 | 12.45 | 12.26 | 12.04 | 11.86 | 11.73 | 11.67 | 11.37 | 11.29 | 11.07 | 11.01 | 11.22 | 11.36 |       |
| 12.91 | 13.46 | 13.16 | 12.63 | 12.04 | 11.46 | 11.03 | 10.74 | 10.36 | 9.83  | 9.54  | 9.47  | 9.51  | 9.08  | 9.02  | 8.53  | 8.54  | 9.22  | 9.46  |       |
| 13.27 | 13.66 | 13.52 | 13.40 | 12.96 | 12.48 | 12.22 | 11.76 | 11.51 | 11.16 | 10.86 | 10.68 | 10.80 | 10.58 | 10.48 | 10.30 | 9.77  | 10.34 | 10.43 |       |
| 13.93 | 14.22 | 13.94 | 13.60 | 13.21 | 12.73 | 12.46 | 12.08 | 11.79 | 11.45 | 11.16 | 11.01 | 11.09 | 10.79 | 10.73 | 10.26 | 10.14 | 10.69 | 10.89 |       |
| 13.62 | 14.35 | 13.86 | 13.55 | 13.27 | 12.75 | 12.48 | 11.98 | 11.69 | 11.33 | 11.10 | 11.00 | 10.87 | 10.60 | 10.47 | 10.10 | 10.05 | 10.27 | 10.52 |       |
| 14.09 | 14.59 | 14.48 | 14.21 | 13.87 | 13.32 | 12.95 | 12.64 | 12.32 | 11.95 | 11.80 | 11.59 | 11.56 | 11.46 | 11.34 | 11.03 | 10.79 | 11.17 | 11.43 |       |
| 13.97 | 14.35 | 14.07 | 13.77 | 13.33 | 12.62 | 12.37 | 12.03 | 11.59 | 11.18 | 11.04 | 11.03 | 11.03 | 10.70 | 10.86 | 10.30 | 10.00 | 10.51 | 10.73 |       |
| 13.49 | 13.81 | 13.64 | 13.38 | 13.04 | 12.39 | 12.15 | 11.71 | 11.36 | 10.99 | 10.76 | 10.73 | 10.75 | 10.37 | 10.31 | 9.77  | 9.69  | 9.99  | 10.47 |       |

| Dec19   |
|---------|---------|---------|---------|---------|---------|---------|---------|---------|---------|---------|---------|---------|---------|---------|---------|
| Opening |
| -0.33   | -0.34   | -0.37   | -0.38   | -0.40   | -0.40   | -0.41   | -0.41   | -0.41   | -0.38   | -0.36   | -0.35   | -0.36   | -0.36   | -0.37   | -0.38   |
| -1.07   | -1.12   | -1.16   | -1.20   | -1.22   | -1.22   | -1.24   | -1.26   | -1.25   | -1.17   | -1.09   | -1.09   | -1.12   | -1.16   | -1.20   | -1.23   |
| -0.37   | -0.37   | -0.37   | -0.38   | -0.38   | -0.38   | -0.39   | -0.39   | -0.39   | -0.39   | -0.39   | -0.39   | -0.40   | -0.39   | -0.39   | -0.39   |
| -0.43   | -0.43   | -0.43   | -0.43   | -0.44   | -0.44   | -0.45   | -0.45   | -0.45   | -0.45   | -0.45   | -0.46   | -0.47   | -0.46   | -0.47   | -0.46   |
| -0.36   | -0.36   | -0.36   | -0.37   | -0.37   | -0.37   | -0.37   | -0.38   | -0.38   | -0.38   | -0.39   | -0.40   | -0.40   | -0.40   | -0.39   | -0.39   |
| -0.29   | -0.29   | -0.29   | -0.29   | -0.29   | -0.30   | -0.30   | -0.31   | -0.31   | -0.32   | -0.32   | -0.33   | -0.33   | -0.33   | -0.33   | -0.32   |
| -0.40   | -0.40   | -0.41   | -0.41   | -0.41   | -0.41   | -0.42   | -0.42   | -0.42   | -0.42   | -0.43   | -0.46   | -0.47   | -0.48   | -0.48   | -0.47   |
| -0.33   | -0.33   | -0.33   | -0.34   | -0.34   | -0.35   | -0.35   | -0.35   | -0.35   | -0.35   | -0.35   | -0.36   | -0.36   | -0.36   | -0.36   | -0.35   |
| -0.36   | -0.36   | -0.37   | -0.37   | -0.37   | -0.37   | -0.37   | -0.38   | -0.38   | -0.38   | -0.38   | -0.39   | -0.39   | -0.39   | -0.39   | -0.39   |
| -0.37   | -0.37   | -0.37   | -0.38   | -0.38   | -0.39   | -0.39   | -0.39   | -0.39   | -0.39   | -0.39   | -0.40   | -0.40   | -0.40   | -0.40   | -0.40   |
| -0.42   | -0.43   | -0.44   | -0.44   | -0.45   | -0.45   | -0.45   | -0.46   | -0.45   | -0.45   | -0.45   | -0.46   | -0.46   | -0.47   | -0.47   | -0.46   |
| -0.43   | -0.44   | -0.44   | -0.45   | -0.46   | -0.46   | -0.47   | -0.47   | -0.47   | -0.47   | -0.46   | -0.47   | -0.46   | -0.47   | -0.46   | -0.46   |
| -0.49   | -0.51   | -0.53   | -0.54   | -0.54   | -0.55   | -0.54   | -0.55   | -0.55   | -0.55   | -0.51   | -0.50   | -0.52   | -0.54   | -0.55   | -0.57   |

| Dec19      |
|-----------|-----------|-----------|-----------|-----------|-----------|-----------|-----------|-----------|-----------|-----------|-----------|-----------|-----------|-----------|------------|
| Settlemen | Settlement |
| -0.06     | 0.01      | 0.06      | 0.10      | 0.11      | 0.11      | 0.11      | 0.11      | 0.09      | -0.05     | -0.16     | -0.20     | -0.16     | -0.11     | -0.07     | -0.01      |
| 0.13      | 0.13      | 0.12      | 0.11      | 0.10      | 0.10      | 0.11      | 0.11      | 0.11      | 0.13      | 0.13      | 0.12      | 0.13      | 0.12      | 0.12      | 0.12       |
| -0.01     | -0.01     | -0.01     | 0.00      | 0.00      | -0.01     | 0.00      | 0.00      | 0.00      | -0.01     | -0.01     | -0.02     | -0.01     | -0.01     | -0.01     | 0.00       |
| -0.02     | -0.02     | -0.02     | -0.02     | -0.02     | -0.03     | -0.02     | -0.03     | -0.03     | -0.04     | -0.04     | -0.04     | -0.04     | -0.03     | -0.03     | -0.03      |
| -0.08     | -0.08     | -0.08     | -0.08     | -0.08     | -0.09     | -0.09     | -0.09     | -0.09     | -0.10     | -0.09     | -0.10     | -0.09     | -0.08     | -0.09     | -0.08      |
| -0.02     | -0.01     | -0.01     | 0.00      | -0.01     | 0.00      | 0.00      | -0.01     | 0.00      | -0.01     | -0.03     | -0.03     | -0.02     | -0.02     | -0.02     | -0.01      |
| 0.02      | 0.03      | 0.01      | 0.01      | 0.02      | 0.02      | 0.01      | 0.01      | 0.01      | 0.01      | 0.01      | 0.00      | 0.02      | 0.01      | 0.01      | 0.02       |
| -0.05     | -0.04     | -0.04     | -0.04     | -0.04     | -0.04     | -0.04     | -0.04     | -0.04     | -0.05     | -0.06     | -0.05     | -0.06     | -0.05     | -0.04     | -0.04      |
| -0.03     | -0.04     | -0.03     | -0.02     | -0.02     | -0.02     | -0.03     | -0.03     | -0.03     | -0.04     | -0.05     | -0.05     | -0.04     | -0.04     | -0.04     | -0.04      |
| -0.02     | -0.01     | -0.01     | -0.02     | -0.01     | -0.01     | -0.02     | -0.02     | -0.02     | -0.02     | -0.03     | -0.03     | -0.02     | -0.02     | -0.02     | -0.02      |
| -0.10     | -0.10     | -0.10     | -0.10     | -0.10     | -0.10     | -0.10     | -0.11     | -0.11     | -0.11     | -0.12     | -0.11     | -0.11     | -0.11     | -0.10     | -0.11      |
| 0.03      | 0.03      | 0.02      | 0.02      | 0.03      | 0.03      | 0.03      | 0.03      | 0.03      | 0.03      | 0.01      | 0.01      | 0.01      | 0.03      | 0.02      | 0.02       |
| -0.04     | -0.04     | -0.02     | -0.01     | -0.01     | 0.01      | -0.02     | -0.01     | -0.01     | -0.03     | -0.04     | -0.06     | -0.06     | -0.05     | -0.05     | -0.04      |

| Dec19 |
|-------|-------|-------|-------|-------|-------|-------|-------|-------|-------|-------|-------|-------|-------|-------|-------|
| Tem.  |
| 10.01 | 10.20 | 11.26 | 11.74 | 12.57 | 12.23 | 12.21 | 12.40 | 12.20 | 12.04 | 11.61 | 11.43 | 11.14 | 10.88 | 10.68 | 10.56 |
| 11.59 | 11.71 | 12.46 | 12.67 | 13.38 | 13.33 | 13.33 | 13.61 | 13.39 | 13.31 | 13.12 | 12.93 | 12.83 | 12.75 | 12.43 | 12.34 |
| 11.35 | 11.58 | 12.22 | 12.62 | 13.01 | 13.01 | 12.74 | 12.89 | 12.80 | 12.74 | 12.21 | 12.26 | 11.88 | 11.68 | 11.70 | 11.55 |
| 10.83 | 11.01 | 11.60 | 12.01 | 12.43 | 12.29 | 12.33 | 12.49 | 12.51 | 12.40 | 12.13 | 11.99 | 11.84 | 11.65 | 11.63 | 11.50 |
| 11.58 | 11.72 | 12.35 | 12.67 | 13.30 | 13.05 | 13.00 | 13.25 | 13.14 | 13.08 | 12.78 | 12.76 | 12.49 | 12.36 | 12.27 | 12.14 |
| 11.60 | 11.75 | 12.16 | 12.45 | 12.82 | 12.83 | 12.87 | 12.96 | 12.91 | 12.90 | 12.77 | 12.67 | 12.46 | 12.41 | 12.31 | 12.20 |
| 9.90  | 10.01 | 11.04 | 11.35 | 11.81 | 11.56 | 11.69 | 11.90 | 11.75 | 11.60 | 11.31 | 11.13 | 10.72 | 10.67 | 10.48 | 10.33 |
| 10.82 | 10.82 | 11.49 | 11.88 | 12.14 | 12.31 | 12.15 | 12.42 | 12.36 | 12.30 | 11.95 | 12.02 | 11.69 | 11.56 | 11.38 | 11.25 |
| 11.12 | 11.47 | 12.09 | 12.25 | 12.88 | 12.65 | 12.57 | 12.80 | 12.66 | 12.75 | 12.44 | 12.30 | 12.00 | 11.86 | 11.83 | 11.92 |
| 11.08 | 11.18 | 11.59 | 12.13 | 12.58 | 12.55 | 12.53 | 12.61 | 12.42 | 12.37 | 12.15 | 12.05 | 11.79 | 11.72 | 11.49 | 11.56 |
| 11.76 | 11.88 | 12.62 | 13.06 | 13.42 | 13.31 | 13.35 | 13.50 | 13.48 | 13.45 | 13.18 | 12.94 | 12.75 | 12.66 | 12.42 | 12.46 |
| 11.03 | 11.16 | 12.03 | 12.47 | 12.82 | 12.61 | 12.82 | 12.95 | 12.85 | 12.74 | 12.50 | 12.32 | 12.12 | 11.89 | 11.73 | 11.68 |
| 10.86 | 11.00 | 11.64 | 12.00 | 12.50 | 12.43 | 12.44 | 12.53 | 12.48 | 12.36 | 12.06 | 12.02 | 11.77 | 11.47 | 11.45 | 11.41 |
